# Supplementary material
Source: PubMed Central journal article supplement (PMC4917454)

## **Supplemental Material**

### **Supplemental Table 1: Natural Language Processing Program Search Terms**

Biventricular Failure  
Biventricular Heart Failure  
Cardiac Failure  
CHF  
Congestive Failure  
Congestive Heart Failure  
Heart Failure

**Supplemental Table 2: SHFM Components and Quantification of Missing Variables**

| <b>SHFM Component</b>                         | <b>If missing,<br/>n (%)</b> |
|-----------------------------------------------|------------------------------|
| Age                                           |                              |
| Angiotensin Converting Enzyme Inhibitor (yes) |                              |
| Angiotensin Receptor Blocker (yes)            |                              |
| Beta-Blocker (yes)                            |                              |
| Carvedilol (yes)                              |                              |
| Digoxin (yes)                                 |                              |
| Creatinine                                    | 1 (0.2)                      |
| Daily Diuretic Dose                           |                              |
| Ejection Fraction                             |                              |
| Gender                                        |                              |
| Implantable Cardioverter Defibrillator (yes)  |                              |
| Ischemic Cardiomyopathy                       |                              |
| New York Heart Association Class              | 12 (3)                       |
| Serum Sodium                                  | 4 (1)                        |
| Statin                                        |                              |
| Systolic Blood Pressure                       |                              |

**Supplemental Figure 1:**

Mortality sensitivity analysis within derivation cohort. Calibration histograms shown: 1-year observed mortality (black bar) and SHFM-predicted mortality Risk (grey bar). Patients are stratified within the pre-specified categories of “clinically relevant” 1-year risk [low ( $\leq 2.5\%$ ), intermediate (2.6-10%), and high risk ( $>10\%$ )] according to SHFM -predicted probabilities and subsequently according to BNP levels above ( $\uparrow$ ) or below ( $\downarrow$ ) the optimal partition-value (700 pg/ml) based on ROC-analysis.

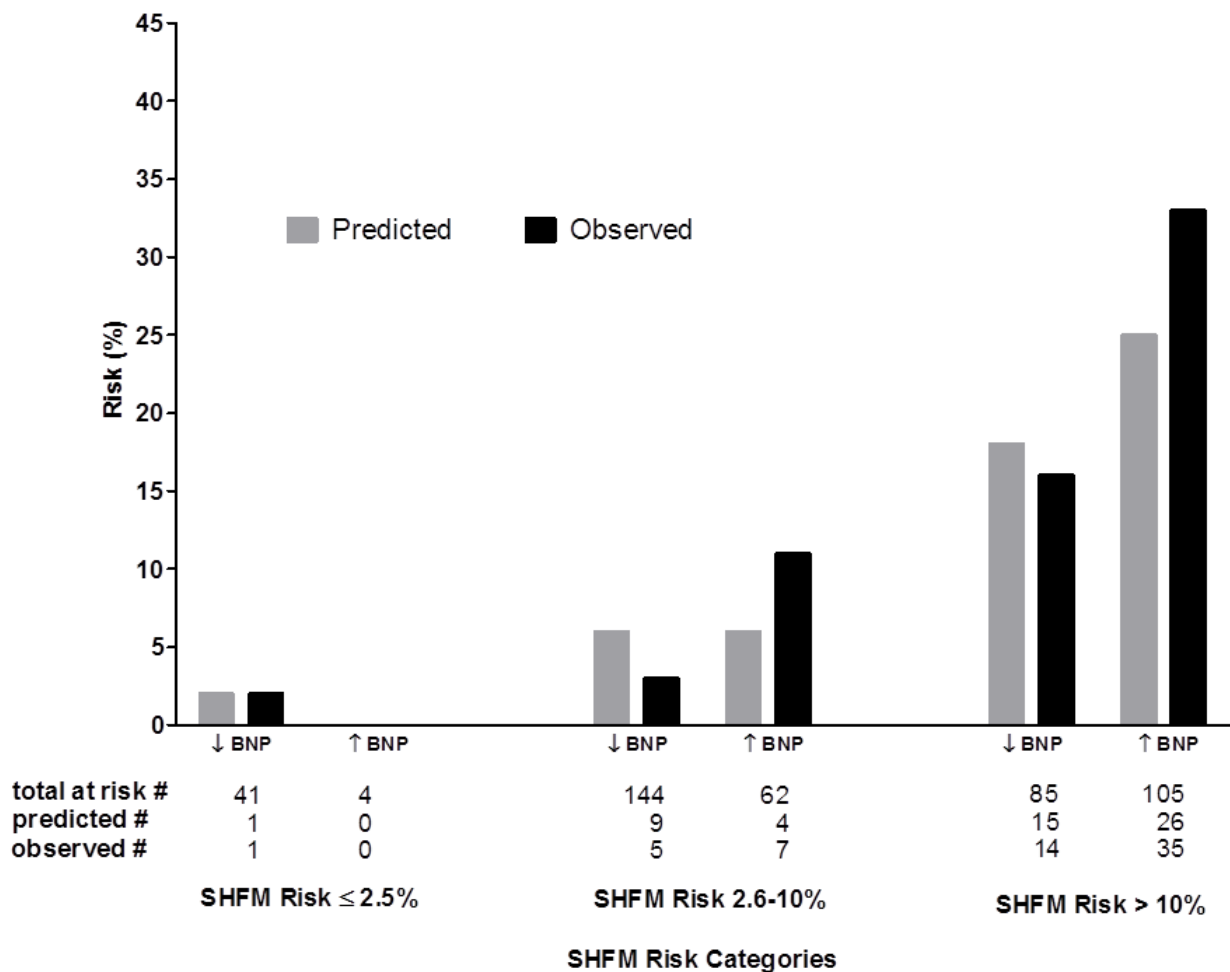

Supplement: NIHMS752497-supplement.pdf [file NIHMS752497-supplement.pdf]
